# Supplementary material for: Tumor-Suppressive miR-192-5p Has Prognostic Value in Pancreatic Ductal Adenocarcinoma
Source: MDPI journal article supplement (doi:10.3390/cancers12061693), 2020-06-25
Supplement: s1 [file s1]

## Supplementary Materials

# Tumor-Suppressive miR-192-5p has Prognostic Value in Pancreatic Ductal Adenocarcinoma

Isabelle Flammang, Moritz Reese, Zixuan Yang, Johannes A. Eble and Sameer A. Dhayat

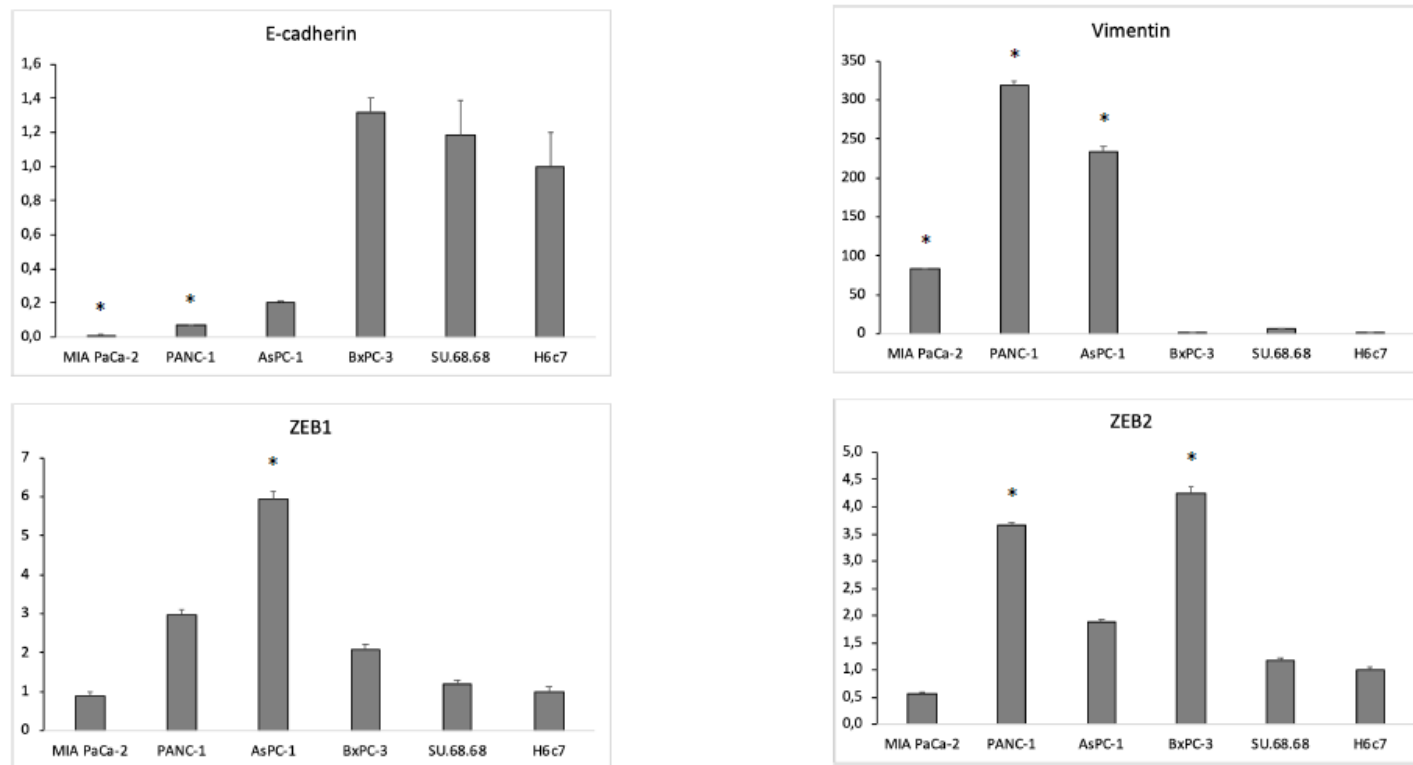

**Figure S1.** Expression of E-cadherin, Vimentin, ZEB1, and ZEB2 in benign and malignant pancreatic cell lines. Data are plotted as  $2^{-\Delta\Delta C_q} \pm$  standard error of the mean, relative to benign epithelial pancreatic duct cell line H6c7. \* indicates statistical significance to H6c7 as assessed by Kruskal-Wallis test and assumed at  $p \leq 0.05$ .

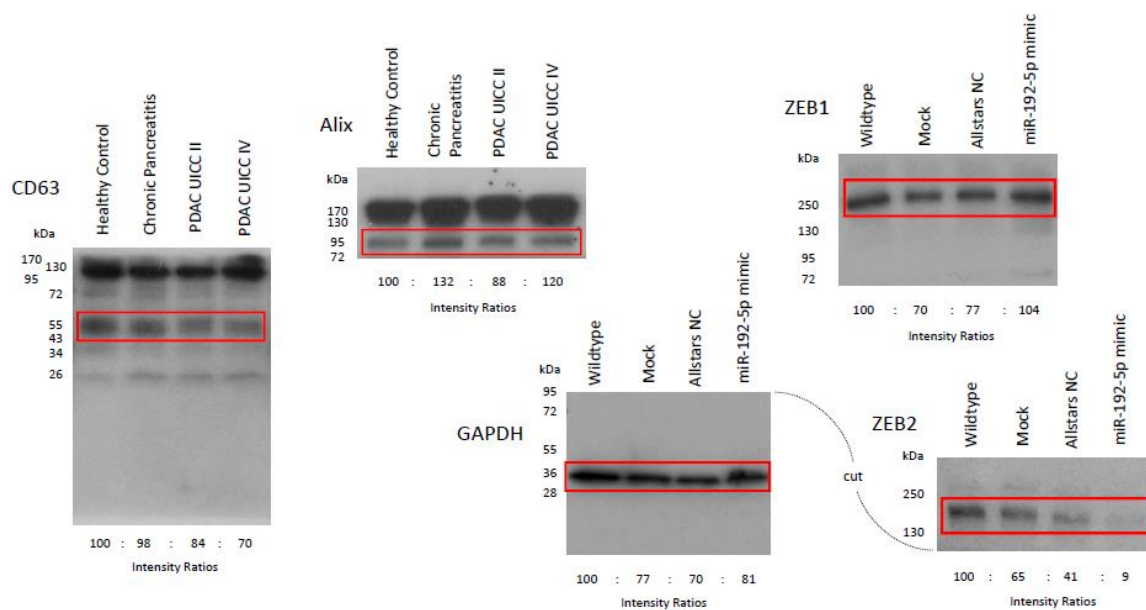

**Figure S2.** Whole western blot images and intensity ratios relative to healthy controls or wildtype. Red boxes indicate cropped area. Detailed information about western blot can be found at Figure S3.

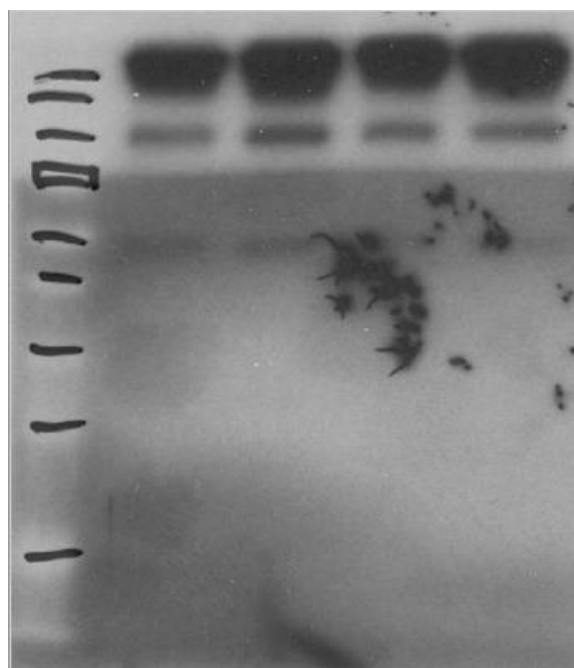

**Figure S3.** Alix.

**Table S1.** Landscape of trials investigating microRNA-192-5p in human malignancies.

| Study                  | Entity | Expression          |                     |                    |                                                                                                                            | Diagnostic & Prognostic Value                                                                                                                                                             |
|------------------------|--------|---------------------|---------------------|--------------------|----------------------------------------------------------------------------------------------------------------------------|-------------------------------------------------------------------------------------------------------------------------------------------------------------------------------------------|
|                        |        | Tissue              | Blood               | Exosomes           | In Vitro                                                                                                                   |                                                                                                                                                                                           |
| Flammang (2020)        | PDAC   | ↓ ( <i>n</i> = 31)  | ↑ ( <i>n</i> = 42)  | ↑ ( <i>n</i> = 44) | ↑ Primary tumor (PANC-1, MIA PaCa-2)<br>↑ Malignant ascites metastasis (AsPC-1)<br>↓ ZEB2 after miR-192-mimic-transfection | - Tissue: AUC 0.86 (PDAC vs. HC)<br>- Serum: AUC 0.64 (PDAC vs. HC)<br>- Exosomes: AUC 0.83 (PDAC vs. HC) -<br>Overexpression in tissue correlated with<br>improved OS (20 vs. 12 months) |
| Zhao<br>(2013) [30]    | PDAC   | ↑ ( <i>n</i> = 80)  | ↑ ( <i>n</i> = 70)  |                    | ↑ Primary tumor (PANC-1, MIA PaCa-2)<br>↑ Malignant ascites metastasis (AsPC-1)                                            | - Serum: AUC 0.63 (PDAC vs. HC)                                                                                                                                                           |
| Botla<br>(2016) [31]   | PDAC   | ↓ ( <i>n</i> = 94)  |                     |                    | ↓ cell proliferation<br>↑ apoptosis                                                                                        | - AUC 0.90 (PDAC vs. HC)<br>- Overexpression correlated with<br>improved OS                                                                                                               |
| Zhou<br>(2018) [27]    | PDAC   |                     | ↑ ( <i>n</i> = 41)  |                    |                                                                                                                            | - Plasma: AUC 0.937 (PDAC vs. HC)                                                                                                                                                         |
| Zou<br>(2019) [28]     | PDAC   | ↑ ( <i>n</i> = 129) | ↑ ( <i>n</i> = 44)  | ↑ ( <i>n</i> = 32) |                                                                                                                            | - Serum: AUC 0.68 (PDAC vs. HC)                                                                                                                                                           |
| Manohar<br>(2017) [36] | PAC    | ↑ ( <i>n</i> = 109) | ↑ ( <i>n</i> = 74)  |                    |                                                                                                                            | - UICC stage III: overexpression<br>correlated with reduced survival                                                                                                                      |
| Huang<br>(2017) [38]   | ESCC   | ↑ ( <i>n</i> = 36)  | ↑ ( <i>n</i> = 140) | ↑ ( <i>n</i> = 28) |                                                                                                                            | - Serum: AUC 0.662 (ESCC vs. HC)                                                                                                                                                          |
| Xie<br>(2019) [45]     | GC     |                     |                     |                    | ↓ Cisplatin-resistant GC cell line                                                                                         | - Overexpression reverses<br>Cisplatin resistance of GC in mice<br>- Potential therapeutic marker                                                                                         |
| Zheng<br>(2019) [42]   | CRC    |                     |                     |                    | ↓ CRC cell lines (HCT-116, HT-29, SW480,<br>RKO)<br>↓ cell proliferation<br>↓ cell migration<br>↓ cell invasion            |                                                                                                                                                                                           |
| Huang<br>(2020) [43]   | CRC    |                     |                     |                    | ↓ CRC cell lines (HCT-116, SW480)<br>↓ cell proliferation<br>↓ cell migration<br>↑ apoptosis                               |                                                                                                                                                                                           |

|                           |       |                                                                               |                                                                                                                                                      |                                              |
|---------------------------|-------|-------------------------------------------------------------------------------|------------------------------------------------------------------------------------------------------------------------------------------------------|----------------------------------------------|
| Yan-Chun<br>(2017) [47]   | HCC   |                                                                               | ↑ cell proliferation<br>↑ metastasis                                                                                                                 |                                              |
| Chen<br>(2019) [35]       | BrC   | ↓ ( <i>n</i> = 58)                                                            | ↓ cell proliferation                                                                                                                                 |                                              |
| Tavakolian<br>(2019) [34] | BrC   | ↓ ( <i>n</i> = 38)                                                            |                                                                                                                                                      |                                              |
| Zhang<br>(2019) [46]      | BrC   |                                                                               | ↓ BrC cell line (MCF-7/ADR)<br>↓ Doxorubicin-resistant cell line (MCF-7/ADR)<br>↑ Doxorubicin sensitivity<br>↑ apoptosis                             |                                              |
| Jin<br>(2015) [44]        | NSCLC |                                                                               | ↓ cell viability<br>↑ apoptosis                                                                                                                      |                                              |
| Zou<br>(2019) [37]        | NSCLC | ↓ ( <i>n</i> = 78 NSCLC with vs. <i>n</i> = 68 NSCLC without bone metastasis) | ↓ NSCLC cell lines (A549, H1299, PC9, H1650)<br>↓ cell migration<br>↓ cell invasion                                                                  |                                              |
| Kumar<br>(2020) [48]      | NSCLC | ↓ ( <i>n</i> = 75)                                                            |                                                                                                                                                      |                                              |
| Chen<br>(2018) [40]       | PCa   | ↑ ( <i>n</i> = 99)<br>↑ High grade vs. low grade PCa                          | ↑ cell proliferation<br>↑ cell cycle progression                                                                                                     | - Overexpression correlated with shorter RFS |
| Ji<br>(2018) [33]         | BC    | ↓ ( <i>n</i> = 60)                                                            | ↓ BC cell lines (UM-UC-3, 5637, SW 780, J82, T24)<br>↓ cell growth                                                                                   |                                              |
| Zhou<br>(2018) [32]       | OSC   | ↓ ( <i>n</i> = 25)                                                            | ↓ OSC cell lines (143B, U-2 OS)<br>↓ cell proliferation<br>↓ cell migration<br>↓ cell invasion<br>↓ apoptosis<br>↑ Cisplatin sensitivity in OS cells |                                              |
| Tseng<br>(2019) [41]      | Me    |                                                                               | ↓ cell motility<br>↓ cell growth<br>↑ apoptosis                                                                                                      |                                              |

|                      |     |                    |                                                                         |                                                 |
|----------------------|-----|--------------------|-------------------------------------------------------------------------|-------------------------------------------------|
| Huang<br>(2020) [39] | NPC | ↑ ( <i>n</i> = 76) | ↑ cell migration<br>↑ cell invasion<br>↑ cell growth<br>↑ EMT- pathways | - Overexpression correlated with poor prognosis |
|----------------------|-----|--------------------|-------------------------------------------------------------------------|-------------------------------------------------|

Abbreviations: ↑, Upregulation; ↓, Downregulation; AUC, area under the receiver operating characteristic curve; BC, bladder cancer; BrC, breast cancer; CRC, colorectal carcinoma; ESCC, esophageal squamous cell carcinoma; GC, gastric cancer; HC, healthy controls; HCC, hepatocellular carcinoma; MM, malignant melanoma; *n*, number of patients; NPC, nasopharyngeal carcinoma; NSCLC, non-small cell lung cancer; OS, overall survival; OSC, osteosarcoma; PAC, periampullary carcinoma; PCa, prostate cancer; PDAC, pancreatic ductal adenocarcinoma; RfS, recurrence-free survival.

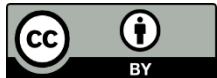

© 2020 by the authors. Licensee MDPI, Basel, Switzerland. This article is an open access article distributed under the terms and conditions of the Creative Commons Attribution (CC BY) license (<http://creativecommons.org/licenses/by/4.0/>).
